# Supplementary material for: Effects of human activities and climate change on water quality and health risks of typical urban rivers in arid/semi-arid areas: a ten-year historical analysis
Source: Royal Society of Chemistry journal article supplement (doi:10.1039/d4ew00689e), 2024-11-04
Supplement: d4ew00689e1.pdf [file d4ew00689e1.pdf]

## Supporting information

### Appendix A1: Climate extreme indices calculation

#### (1) Maximum length of wet spell (CWD)

Maximum number of consecutive days with  $RR \geq 1$  mm. Let  $RR_{ij}$  be the daily precipitation amount on day  $i$  in period  $j$ . Count the largest number of consecutive days where:  $RR_{ij} \geq 1$  mm.

#### (2) Maximum length of dry spell (CDD)

Maximum number of consecutive days with  $RR < 1$  mm. Let  $RR_{ij}$  be the daily precipitation amount on day  $i$  in period  $j$ . Count the largest number of consecutive days where:  $RR_{ij} < 1$  mm.

#### (3) Simple precipitation intensity index (SDII)

Let  $RR_{wj}$  be the daily precipitation amount on wet days,  $w$  ( $RR \geq 1$  mm) in period  $j$ . If  $W$

represents number of wet days in  $j$ , then

$$SDII_j = \frac{\sum_{w=1}^W RR_{wj}}{W}$$

#### (4) Cold spell duration index (CSDI)

Annual count of days with at least 6 consecutive days when  $TN < 10^{\text{th}}$  percentile. Let  $TN_{ij}$  be the daily maximum temperature on day  $i$  in period  $j$  and let  $TN_{in10}$  be the calendar day 10th percentile centred on a 5-day window for the base period. Then the number of days per period is summed where, in intervals of at least 6 consecutive days:  $TN_{ij} < TN_{in10}$ .

#### (5) Warm spell duration index (WSDI)

Annual count of days with at least 6 consecutive days when  $TX > 90^{\text{th}}$  percentile. Let  $TX_{ij}$  be the daily maximum temperature on day  $i$  in period  $j$  and let  $TX_{in90}$  be the calendar day 90th percentile centred on a 5-day window for the base period. Then the number of days per period is summed where, in intervals of at least 6 consecutive days:  $TX_{ij} > TX_{in90}$ .

#### (6) Growing season length (GSL)

Annual (1<sup>st</sup> Jan to 31<sup>st</sup> Dec in Northern Hemisphere (NH), 1<sup>st</sup> July to 30<sup>th</sup> June in Southern Hemisphere (SH)) count between first span of at least 6 days with daily mean temperature  $TG > 5$  °C and first span after July 1<sup>st</sup> (Jan 1<sup>st</sup> in SH) of 6 days with  $TG < 5$  °C. Let  $TG_{ij}$  be daily mean temperature on day  $i$  in year  $j$ . Count the number of days between the first occurrence of at least 6

consecutive days with:  $TG_{ij} > 5 \text{ }^\circ\text{C}$ . and the first occurrence after 1<sup>st</sup> July (1<sup>st</sup> Jan. in SH) of at least 6 consecutive days with:  $TG_{ij} < 5 \text{ }^\circ\text{C}$ .

(7) Number of tropical nights (TR)

Annual count of days when TN (daily minimum temperature)  $> 20 \text{ }^\circ\text{C}$ . Let  $TN_{ij}$  be daily minimum temperature on day  $i$  in year  $j$ . Count the number of days where:  $TN_{ij} > 20 \text{ }^\circ\text{C}$ .

(8) Number of icing days (ID)

Annual count of days when TX (daily maximum temperature)  $< 0 \text{ }^\circ\text{C}$ . Let  $TX_{ij}$  be daily maximum temperature on day  $i$  in year  $j$ . Count the number of days where:  $TX_{ij} < 0 \text{ }^\circ\text{C}$ .

(9) Number of summer days (SU)

Annual count of days when TX (daily maximum temperature)  $> 25 \text{ }^\circ\text{C}$ . Let  $TX_{ij}$  be daily maximum temperature on day  $i$  in year  $j$ . Count the number of days where:  $TX_{ij} > 25 \text{ }^\circ\text{C}$ .

(10) Number of frost days (FD)

Annual count of days when TN (daily minimum temperature)  $< 0 \text{ }^\circ\text{C}$ . Let  $TN_{ij}$  be daily minimum temperature on day  $i$  in year  $j$ . Count the number of days where:  $TN_{ij} < 0 \text{ }^\circ\text{C}$ .

(11) Seasonality index (SI)

Let  $SI_i$  be the seasonality index of precipitation/temperature in the  $i^{\text{th}}$  year;  $X_{in}$  be the precipitation/temperature of  $n^{\text{th}}$  month in the  $i^{\text{th}}$  year;  $R_i$  be the precipitation/temperature of the  $i^{\text{th}}$

year:

$$SI_i = \frac{1}{R_i} \sum_{n=1}^{12} \left| X_{in} - \frac{R_i}{12} \right|$$

**Table A1 Temporal variation trends of WQI, HI, and R based on Mann Kendall**

| test           |            |            |            |
|----------------|------------|------------|------------|
| Sampling Sites | WQI        | HI         | R          |
| S1             | decrease** | decrease** | decrease** |
| S2             | decrease*  | decrease** | decrease** |
| S3             | decrease*  | decrease** | decrease*  |
| S4             | decrease*  | decrease** | decrease** |
| S5             | decrease** | decrease*  | decrease*  |

S6

/

decrease\*

decrease\*

---

Notes: \*\*indicates  $P < 0.01$ , \*indicates  $P < 0.05$ , / indicates  $P > 0.05$

**Table A2.** Analysis methods and their resources, equipment, and detection limits for water quality parameters

| Project            | Methods                     | Resources                                                                            | Equipment                                        | Detection limit |
|--------------------|-----------------------------|--------------------------------------------------------------------------------------|--------------------------------------------------|-----------------|
| pH                 | Measured in situ            | /                                                                                    | Hach sensION <sup>+</sup> (USA)                  | 0               |
| DO                 | Measured in situ            | /                                                                                    | Hach sensION <sup>+</sup> (USA)                  | 0 mg/L          |
| COD                | Titration                   | GB 11914-1989                                                                        | COD digester (KH COD 8Z,China)                   | 5 mg/L          |
| BOD                | Dilution and seeding method | HJ 505-2009                                                                          | Thermostatic incubator                           | 2 mg/L          |
| TP                 | Spectrophotometry           | GB 11893-1989                                                                        | Spectrophotometer (T6,China)                     | 0.01 mg/L       |
| NH <sub>3</sub> -N | Spectrophotometry           | HJ 535-2009                                                                          | Spectrophotometer (T6,China)                     | 0.025 mg/L      |
| F <sup>-</sup>     | Ion selective electrode     | GB/T 7484-1987                                                                       | Ion meter (PXS-270,China)                        | 0.05 mg/L       |
| As                 | Fluorescence spectrometry   | <i>Water and Wastewater Monitoring and Analysis Methods (4<sup>th</sup> Edition)</i> | Atomic fluorescence spectrometer (AF-630, China) | 0.2 µg/L        |
| Hg                 | Fluorescence spectrometry   | <i>Water and Wastewater Monitoring and Analysis Methods (4<sup>th</sup> Edition)</i> | Atomic fluorescence spectrometer (AF-630,China)  | 0.04 µg/L       |
| Cr <sup>6+</sup>   | Spectrophotometry           | GB/T 7467-1987                                                                       | Spectrophotometer (T6,China)                     | 0.004 mg/L      |
| Cu                 | FAAS                        | GB 7475-1987                                                                         | Atomic absorption spectrometer (L-5000,Japan)    | 0.001 mg/L      |
| Pb                 | FAAS                        | GB 7475-1987                                                                         | Atomic absorption spectrometer (L-5000,Japan)    | 0.001 mg/L      |
| Zn                 | FAAS                        | GB 7475-1987                                                                         | Atomic absorption spectrometer (L-5000,Japan)    | 0.02 mg/L       |
| Cd                 | FAAS                        | GB 7475-1987                                                                         | Atomic absorption spectrometer (L-5000,Japan)    | 0.0001 mg/L     |

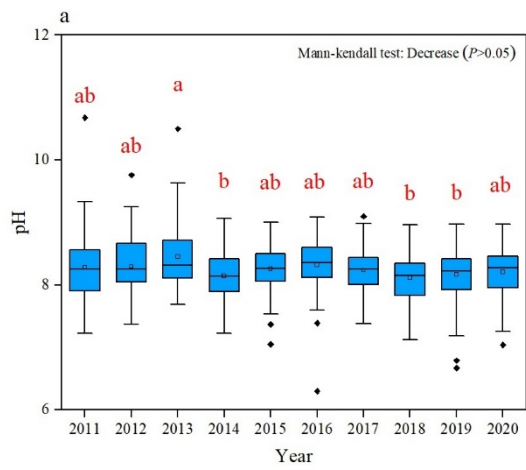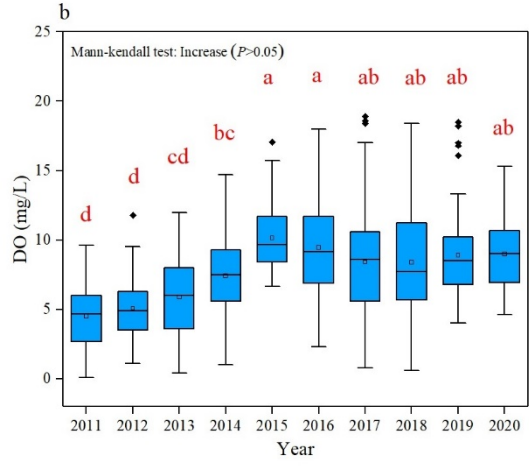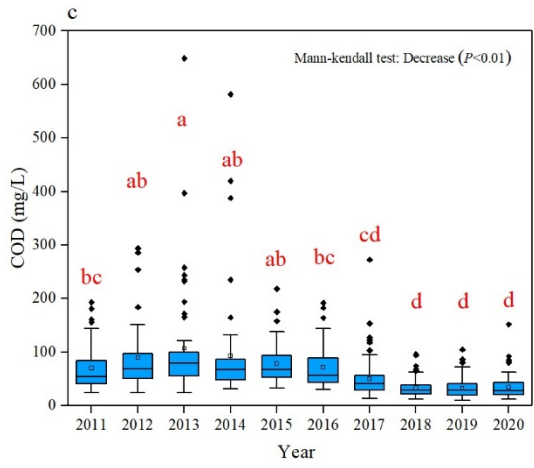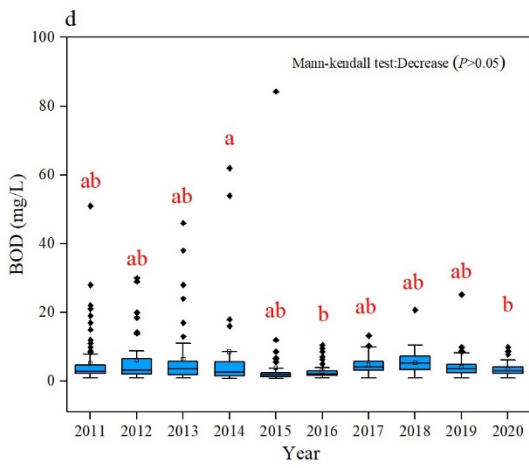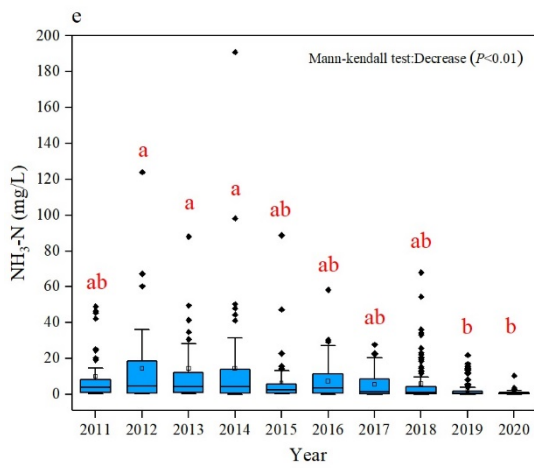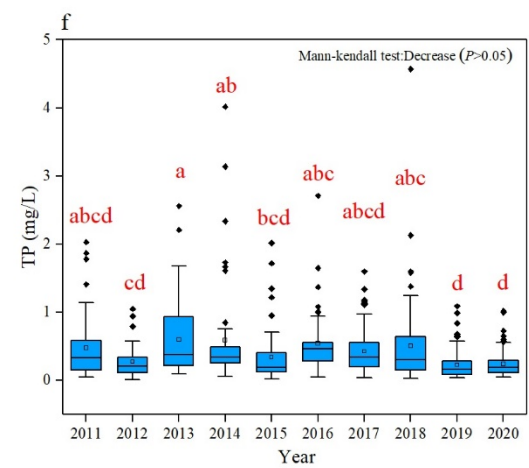

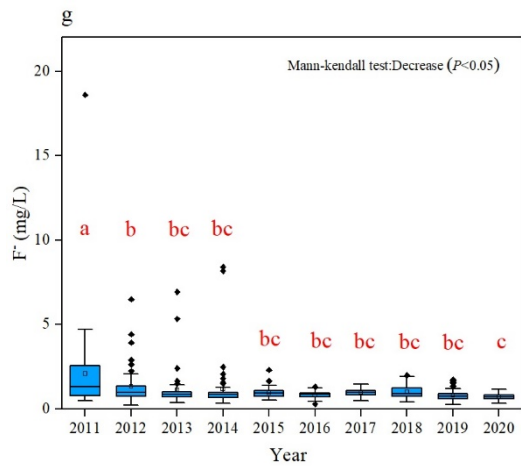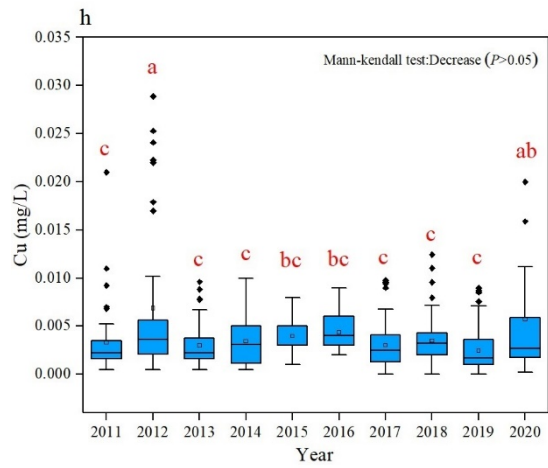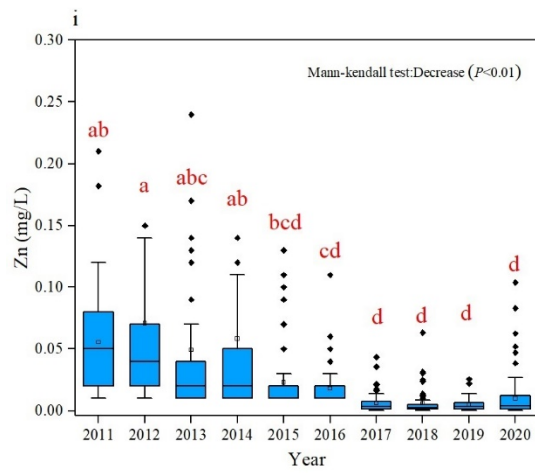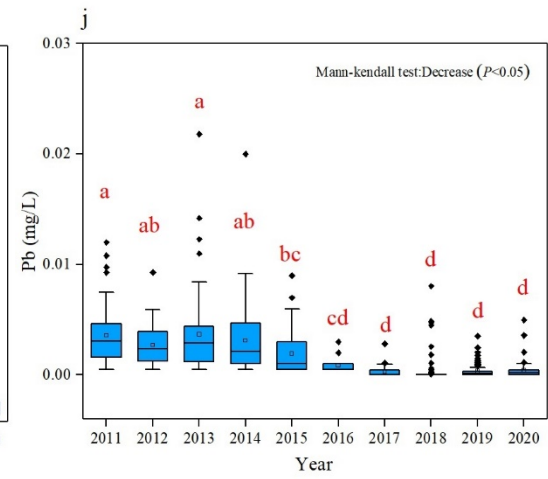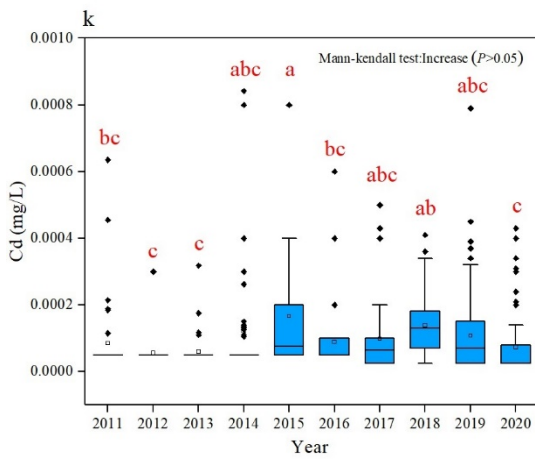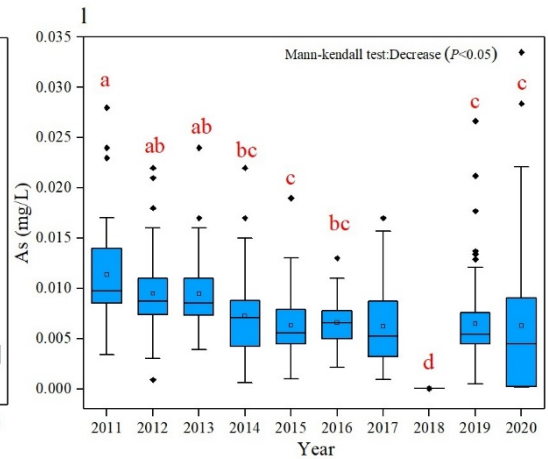

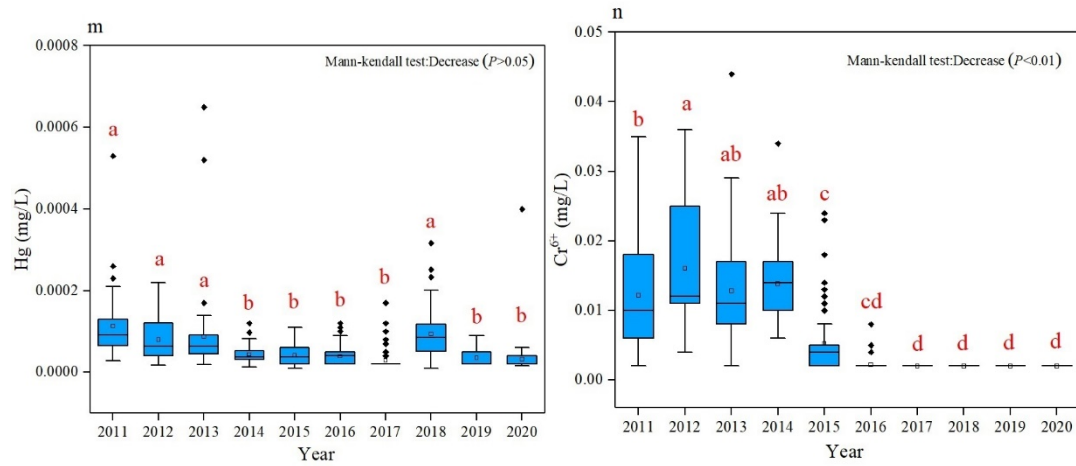

**Fig. A1** Water quality indicators in Diannong River (Shizuishan section) from 2011 to 2020. (a) pH, (b) DO, (c) COD, (d) BOD, (e)  $NH_3-N$ , (f) TP, (g)  $F^-$ , (h) Cu, (i) Zn, (j) Pb, (k) Cd, (l) As, (m) Hg, (n)  $Cr^{6+}$ , completely different letters represent significant differences ( $P < 0.05$ )

**Table. A3** Land use in Diannong River (Shizuishan section) basin from 2011 to 2020

| Year | agricultural<br>land | forest | shrub   | grassland | waters | naked<br>ground | Impermeable<br>surface |
|------|----------------------|--------|---------|-----------|--------|-----------------|------------------------|
| 2011 | 32.32%               | 1.65%  | 0.0004% | 44.10%    | 2.33%  | 8.40%           | 11.20%                 |
| 2012 | 32.13%               | 1.65%  | 0.0003% | 43.01%    | 2.33%  | 9.25%           | 11.63%                 |
| 2013 | 31.98%               | 1.65%  | 0.0003% | 41.31%    | 2.33%  | 10.36%          | 12.37%                 |
| 2014 | 32.00%               | 1.65%  | 0.0003% | 40.38%    | 2.33%  | 11.04%          | 12.60%                 |
| 2015 | 32.23%               | 1.65%  | 0.0003% | 40.47%    | 2.33%  | 10.44%          | 12.87%                 |
| 2016 | 32.35%               | 1.66%  | 0.0003% | 40.63%    | 2.36%  | 9.79%           | 13.20%                 |
| 2017 | 32.62%               | 1.66%  | 0.0003% | 41.59%    | 2.32%  | 8.31%           | 13.49%                 |
| 2018 | 32.84%               | 1.66%  | 0.0003% | 41.39%    | 2.28%  | 8.13%           | 13.69%                 |
| 2019 | 33.10%               | 1.66%  | 0.0003% | 41.63%    | 2.23%  | 7.59%           | 13.79%                 |
| 2020 | 33.14%               | 1.66%  | 0.0003% | 41.11%    | 2.12%  | 7.93%           | 14.04%                 |

a

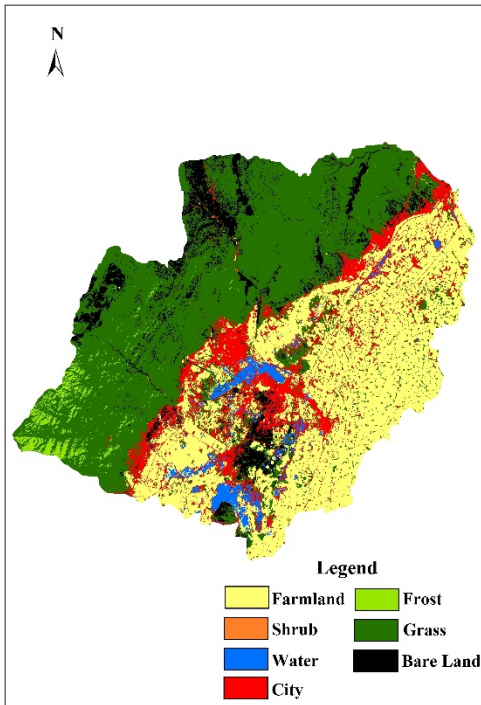

b

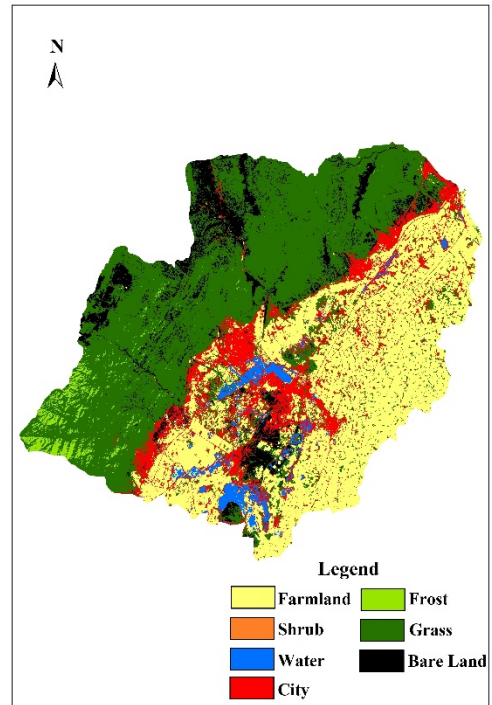

c

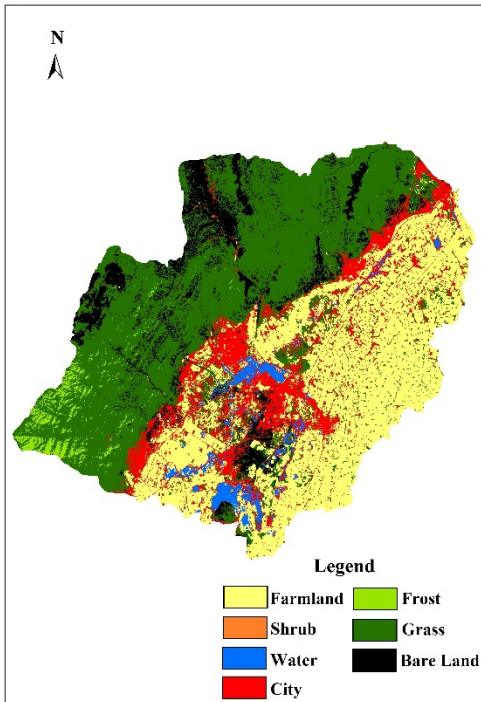

d

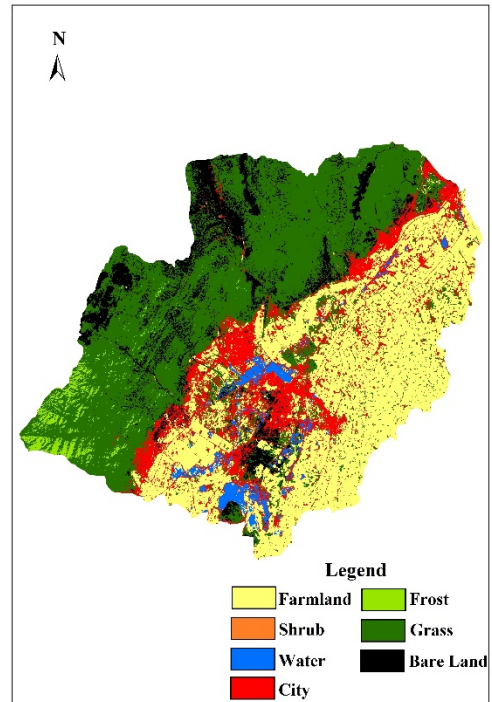



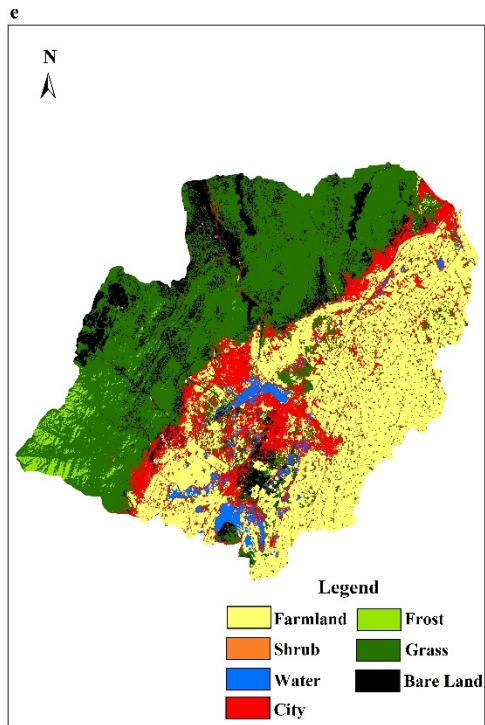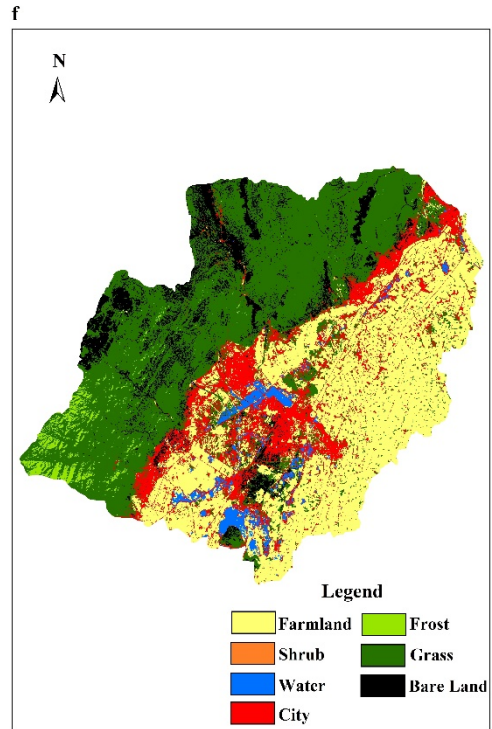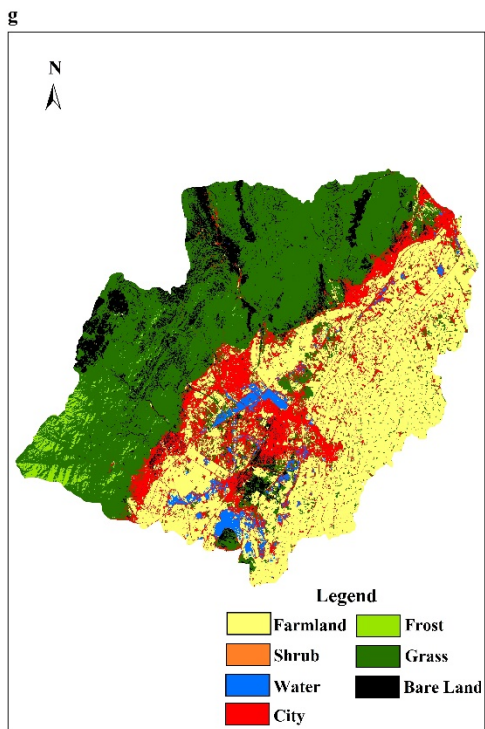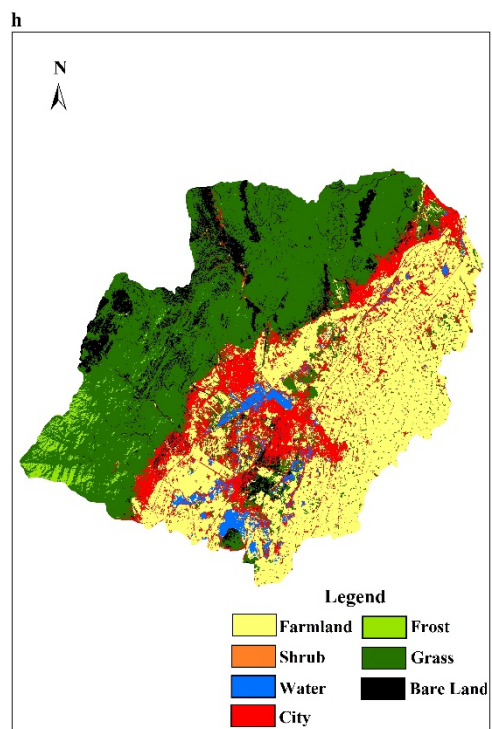

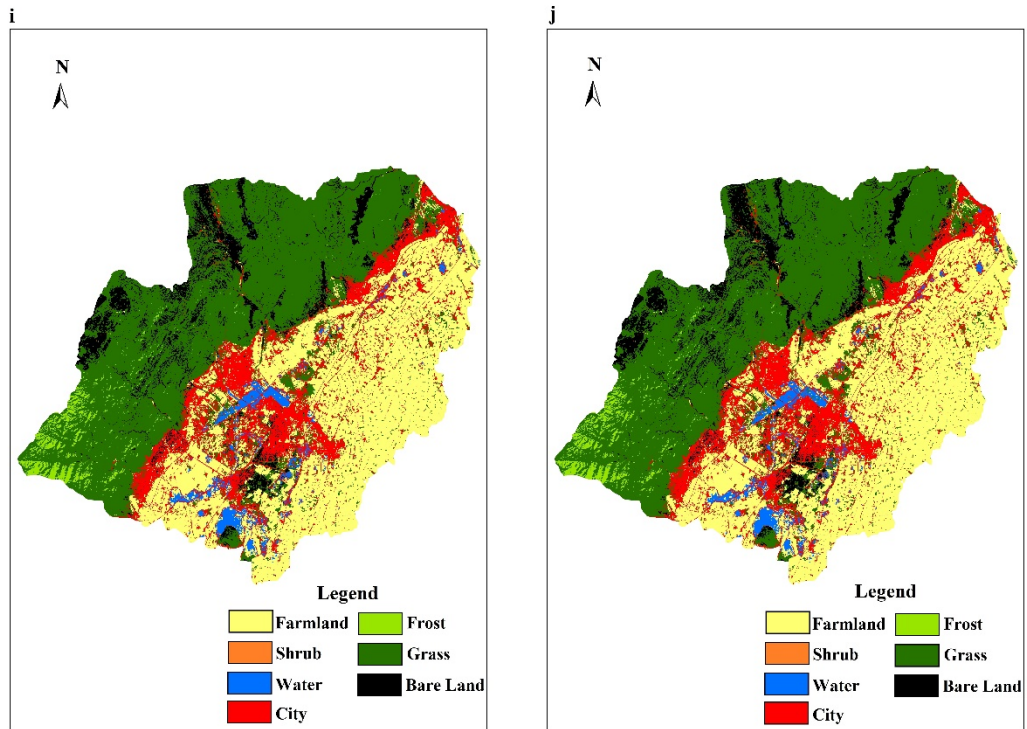

**Fig. A2 Land use in Diannong River (Shizuishan section) basin from 2011 to 2020. (a) 2011, (b) 2012, (c) 2013, (d) 2014, (e) 2015, (f) 2016, (g) 2017, (h) 2018, (i) 2019, (j) 2020**

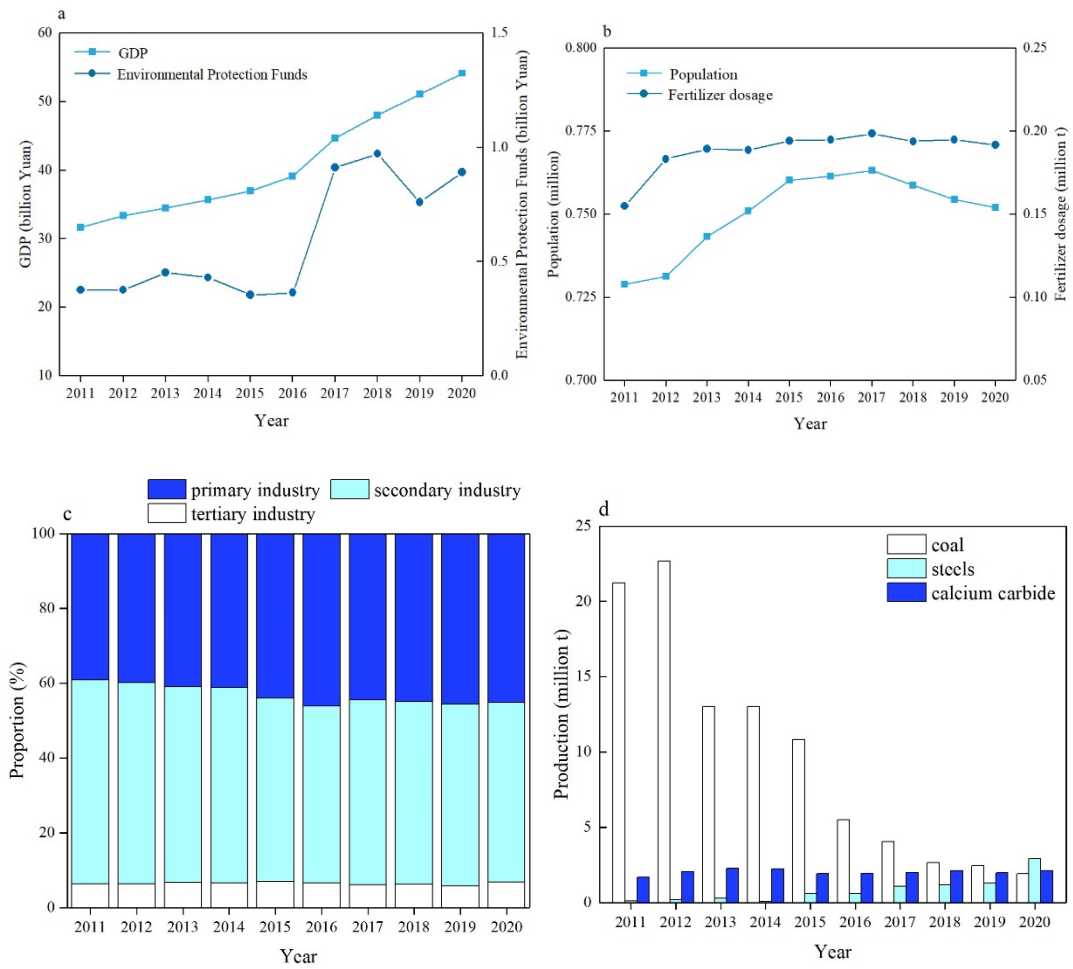

**Fig. A3 Socio-economic indicators in Shizuishan City. (a) GDP and environmental protection funds, (b) Population and fertilizer dosage, (c) the proportion of different industries in GDP, (d) the output of main industrial products in Shizuishan**

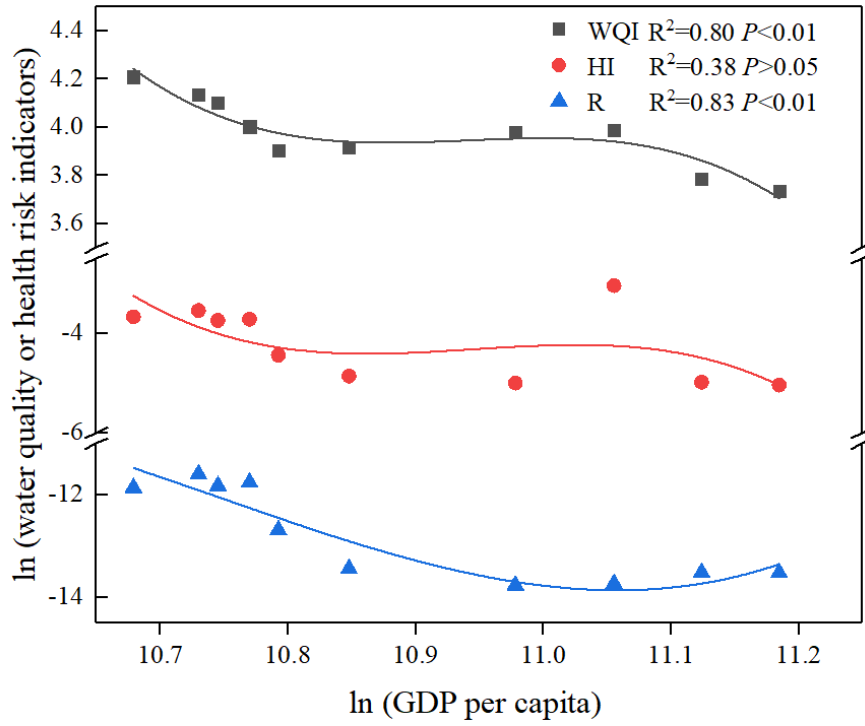

Fig. A4 The environmental Kuznets curve between GDP per capita and WQI, HI, and R

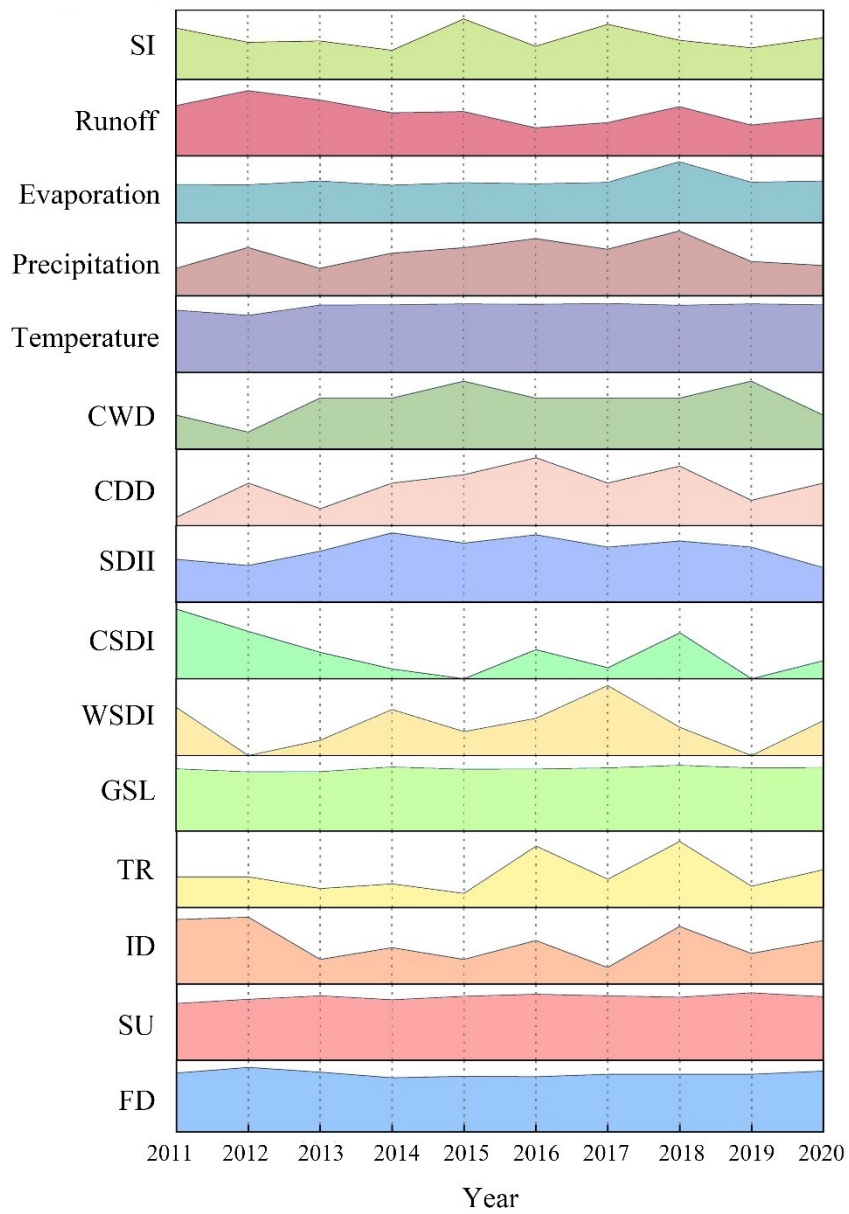

**Fig. A5 Climate change indicators and runoff of Diannong river (Shizuishan section) basin from 2011 to 2020**

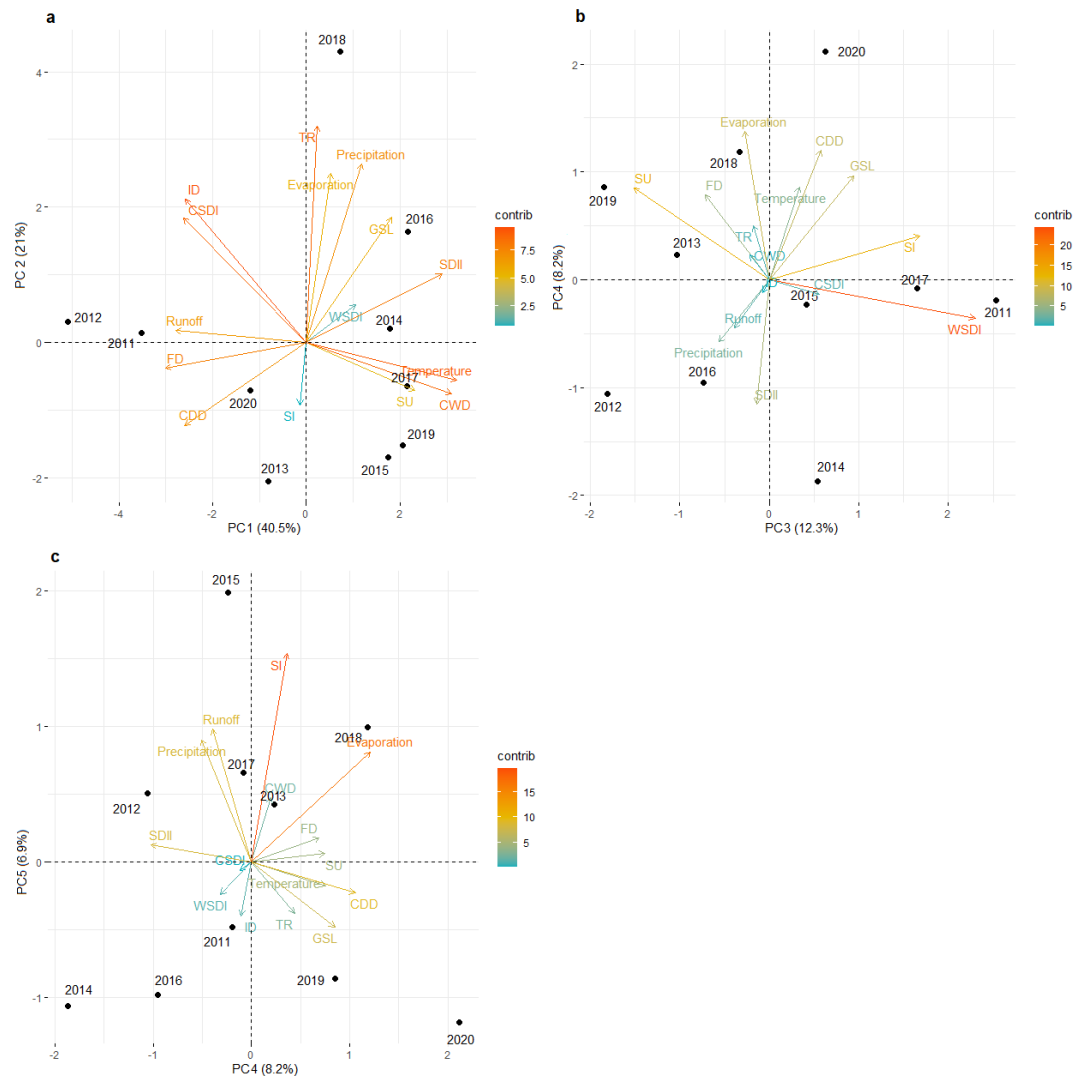

**Fig. A6 PCA of climate change and hydrology indicators. (a) PC1 and PC2, (b) PC3 and PC4, (c) PC4 and PC5**

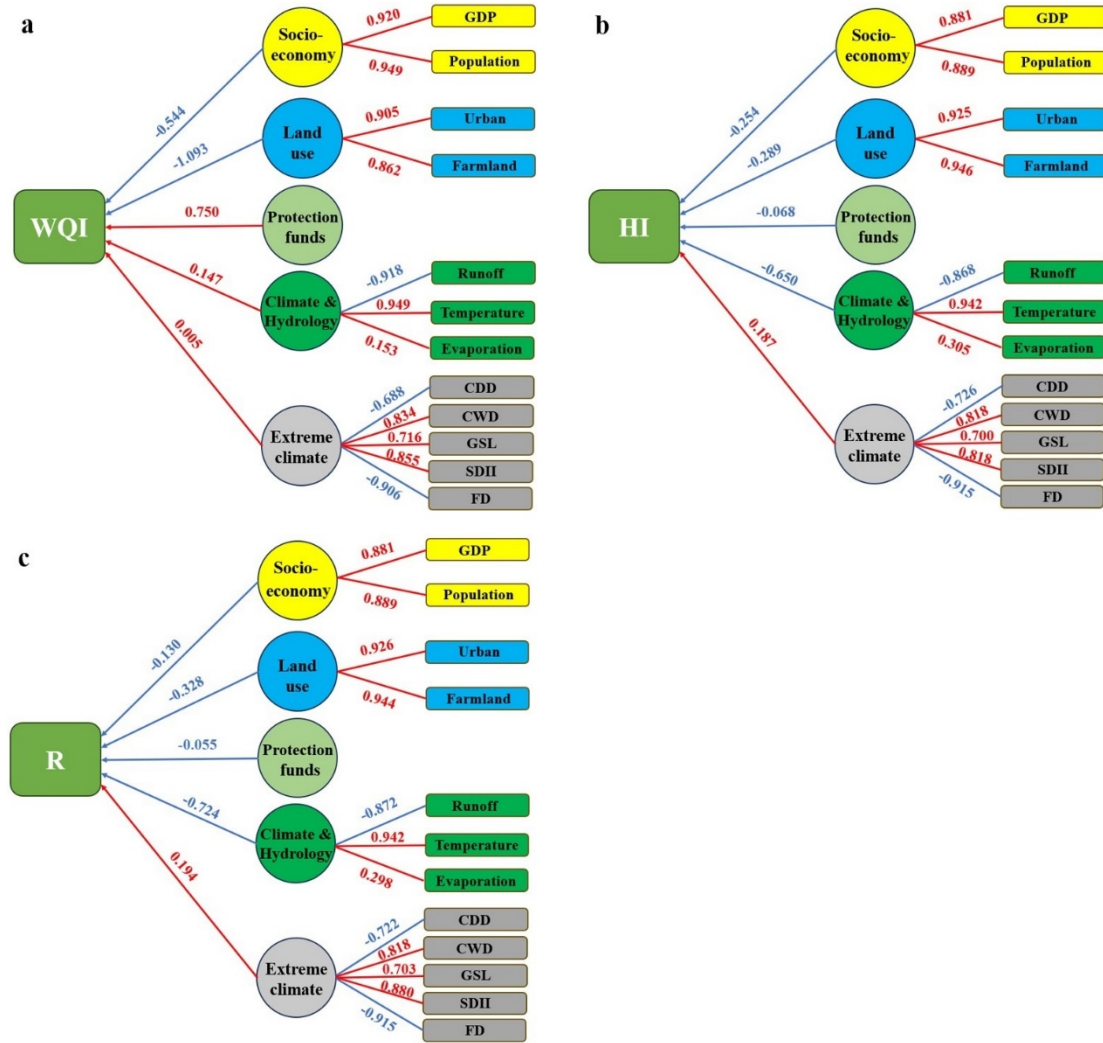

Fig. A6 PLS-PM including all of the parameters. (a) WQI, (b) HI, (c) R

Table A4 The standards of main water quality parameters for drinking water sources (GB 3838-2002, Class III) and irrigation water (GB 5084-2021) in China

| Parameters                | Standard for drinking water sources (GB 3838-2002, Class III) | Standard for irrigation water (GB 5084-2021) |
|---------------------------|---------------------------------------------------------------|----------------------------------------------|
| pH                        | 6~9                                                           | 5.5~8.5                                      |
| DO (mg/L)                 | ≥5                                                            | /                                            |
| COD (mg/L)                | 20                                                            | 200                                          |
| BOD (mg/L)                | 4                                                             | 100                                          |
| NH <sub>3</sub> -N (mg/L) | 1                                                             | /                                            |
| TP (mg/L)                 | 0.2                                                           | /                                            |

|                         |        |       |
|-------------------------|--------|-------|
| F <sup>-</sup> (mg/L)   | 1      | 2     |
| Cu (mg/L)               | 1      | 1     |
| Zn (mg/L)               | 1      | 2     |
| Pb (mg/L)               | 0.05   | 0.2   |
| Cd (mg/L)               | 0.005  | 0.01  |
| As (mg/L)               | 0.05   | 0.1   |
| Hg (mg/L)               | 0.0001 | 0.001 |
| Cr <sup>6+</sup> (mg/L) | 0.05   | 0.1   |

---
